# Supplementary material for: SOX11 expression correlates to promoter methylation and regulates tumor growth in hematopoietic malignancies
Source: Mol Cancer. 2010 Jul 12;9:187. doi: 10.1186/1476-4598-9-187 (PMC2913986; doi:10.1186/1476-4598-9-187)
Supplement: Additional file 2 — Differentially regulated transcripts (n = 4861) in MCL cell lines upon SOX11-overexpression. Contains all transcripts deregulated (1.2 fold change) upon SOX11-overexpression in GRANTA-519 and JEKO-1. [file 1476-4598-9-187-S2.XLS]

## Sheet: Sheet1
Gene Chip Transcripts Cluster Id	Genbank	Genesymbol	355 cell cycle regulatory genes marked with an asterisk (*)
7896736
7896742	BC118988|BC131690	C20orf69
7896748
7896750
7896752	M37726
7896754	AK290103
7896759	AK096570	LOC643837
7896761	BC024295	SAMD11
7896878	BC015549	B3GALT6
7896908	BC034304	PUSL1
7896921		TAS1R3
7896929	BC059409	VWA1
7896983	AF161351
7897006	AB010962|AF057061	MMP23B|MMP23A
7897128	BC029499	ACTRT2
7897293
7897416	AF118274	SLC45A1
7897509	BC014943	NMNAT1
7897774	AK289999	CLCN6
7897849	AK024020	RP5-1077B9.4
7897877	BC052977	TNFRSF1B	*
7898070	U17838	PRDM2
7898084	AB028949	RP1-21O18.1
7898161	BC007233	EFHD2
7898211	AK293006	DDI2|RSC1A1
7898227	BC068599	PLEKHM2
7898278	AF356524	SPEN
7898353		LOC644634
7898371		LOC644634
7898375	AK027791	RNU1A|RNU1A3|RNU1C1|RNU1C2|RNU1D2|RNU1F1|RNU1G3|ATG9B
7898377	BC126912	CROCC
7898411	AK027791	RNU1A|RNU1A3|RNU1C1|RNU1C2|RNU1D2|RNU1F1|RNU1G3|ATG9B
7898549	AF173378	MRTO4
7898570
7898585	BC012037	NBL1
7898607
7898623	BX648631	UBXD3
7898725	BC007028	ELA3A|ELA3B
7898799	AK226152	C1QC
7898902	BC017193	LYPLA2
7898939	BC063583	NPAL3
7898988	BC012444	CLIC4
7899023	BC029770	LDLRAP1	*
7899087	BC028713	PDIK1L
7899093	BC025658	GRRP1
7899220	AF231056	ARID1A	*
7899265	AF029082	SFN	*
7899284	BC069216	LOC388610
7899287
7899394	BC031655	C1orf38
7899455	BC021247	PHACTR4
7899480		SNORA73A
7899484
7899502		RNU11
7899528	U07882	OPRD1
7899615	AY094595	SERINC2|KIAA0746
7899750	BC004269	C1orf90
7899795
7899882	DQ499598|AK021842
7899909
7899955
7899957	BC127113	ZMYM4
7899990	BC024592	NCDN
7900001	BC041175	TFAP2E
7900095	BC106053|CR457254	MAP7D1
7900235	AB029290	MACF1
7900340	AY303954	BMP8A
7900395	U22377	RLF
7900413	AB016068	ZMPSTE24
7900438	AK091612	ZNF643
7900461	BC091518	ZNF684
7900492	AK074957	KCNQ4
7900540	BC039737	FAM80A
7900999	AY254217|BC026115	MGC33556
7901046		SNORD55
7901052		SNORD38B
7901102	BC006122	MMACHC
7901287	AY358631	CYP4Z1
7901336	AB038950	ALS2CR2
7901376	BC047654	RNF11
7901385	AK128043	OSBPL9
7901426	AF104304	ZFYVE9
7901479	DQ646393	ZYG11B
7901535	AY358294	PODN
7901611		C1orf191
7901634	AL832492	C1orf175|TTC4
7901788	AB037860	NFIA
7901852
7901867	BC050525	USP1
7901895	AK027773	ATG4C
7901967
7902038	BC066944	AK3L1|AK3L2
7902104	L20966	PDE4B
7902166	AF515448	MIER1
7902203
7902265
7902269	BC040436	SFRS11
7902306
7902345	BC071765	TYW3
7902367	BC005377	ACADM
7902382	BC020790	RABGGTB
7902396		SNORD45C
7902474
7902476	BX537792|BC130387|BX641170	FAM73A
7902493
7902512	BC034721	DNAJB4	*
7902594	BC035058	PRKACB
7902634	BC016051	BXDC5
7902771	AF350371	SH3GLB1
7902789	AB024568	HS2ST1
7902822	U33052	PKN2
7902891	BC090866	ZNF326
7902913	AF015592	CDC7	*
7902992	BC031070	RPAP2
7903022		SNORD21
7903032	AK290318	MTF2
7903049	AY211918	CCDC18
7903119	M81182	ABCD3
7903239	U84010	AGL
7903281	AB021981	SLC35A3
7903308	BC075811	CCDC76
7903369	BC064692	SLC30A7
7903404		LOC641705
7903507	BC127898	FAM102B
7903519	BC130346	PRPF38B
7903541	AF032922	STXBP3
7903703	M27543	GNAI3	*
7903742	BC108729|BT019947	GSTM4|GSTM2
7903878	AF368063	RBM15
7903988	BC014086	RAP1A
7904000	BC034953	DDX20
7904018	BC016029	CTTNBP2NL
7904048
7904050	AL833353	MOV10
7904086	AK291031	LRIG2
7904137	AB089957	HIPK1
7904314	AF080255	TTF2
7904340	BC052954	MAN1A2
7904364	AF083217	WDR3
7904478	AF172850	LOC51152|LOC100129030
7904572
7904693	AK024925	FLJ21272
7904702	BC065219|AK125792	NOTCH2NL|NBPF10|LOC100132406|KIAA1245|NBPF11|NBPF14|NBPF15|NBPF20|NBPF9|NBPF8|RP3-377D14.1|XXyac-YX155B6.1|NBPF16
7904713
7904751	BC071577|BC017770	RBM8A
7904853	AK001354	GPR89C|GPR89A
7904869	AK289533|BC000158	FAM108A1|FAM108A3|FAM108A2
7904874	BC034418|BC023087|AK054850|AK095459|AK125792|AF379634	NBPF16|NBPF15|LOC100132406|KIAA1245|NBPF11|NBPF14|NBPF20|NBPF9|NBPF10|NBPF8|RP3-377D14.1|XXyac-YX155B6.1|NBPF12
7904879
7904930	BC003187|U78723	GPR89B|GPR89A|GPR89C
7904948	AK289533|BC000158	FAM108A1|FAM108A3|FAM108A2
7904955
7905299	BC025304	PRUNE
7905349	CR457375|AK027120	TNFAIP8L2
7905481
7905512	AF005081	C1orf68|LOC100129271
7905517		LCE1F
7905746	AF159174	AQP10
7905831	BC011378	FLAD1
7905881	AY560600	ADAM15
7905929	AK057845	EFNA1
7906056	BC070067	MSTO1
7906185	BC100932	APOA1BP
7906303	AK127947	C1orf92
7906386	BC090944	PYHIN1
7906400	AF208043	IFI16	*
7906433
7906469	AB164404	DUSP23
7906613	AB027233	SLAMF7
7906757	BC020823	FCGR2A
7906810	BC006286	DUSP12
7906852	AK292369	UHMK1	*
7906863	BC009377	UAP1
7906930	AF326731	NUF2	*
7907008
7907058	BC052274	POU2F1	*
7907090	AY194294|AK024541	LOC100128751
7907124	AB097034	TIPRL
7907135	AL035297	SFT2D2
7907171	BC020716	BLZF1
7907183	BC091516	C1orf112
7907213	BC047476	SCYL1BP1
7907297	BC002780	FMO4
7907310	AF488829	BAT2D1
7907368
7907404	AF097535	C1orf9
7907445	BC063418	KLHL20
7907486	BC006315	ZBTB37
7907492	AB019490	RABGAP1L
7907657	BC047391	RALGPS2
7907680	BC051794|AK289989	FAM20B
7907700
7907702	BC028940	SOAT1
7907790	AF287356	CEP350
7907893	BC012485	MR1
7908003	AY336748	NPL
7908022	AK226102	DHX9
7908097	AB085674	SMG7
7908169	AF141327	RNF2	*
7908330	AY854248|BC003397|DQ323046|AK000512|AK026086	C1orf27
7908347	AF142063	OCLM
7908388	BC015510	RGS1
7908421	BC036658	TROVE2
7908437	AF312865	CDC73
7908543	AB062450	NEK7	*
7908553	AK292131	PTPRC	*
7908614	BC125229	CAMSAP1L1
7908637	BC126386	GPR25
7908777
7908879	EF428334	PPFIA4
7908907	AK127752	ADORA1
7908940	BX537444	ATP2B4
7908978	BC038513	ZC3H11A
7908988	BC072433	SNRPE
7909011	BC067299	MDM4	*
7909142		LOC100130123|NUCKS1
7909400	BX537451	CD46
7909478	AK289613	C1orf107
7909529	AK131312	RCOR3
7909586	L42373	PPP2R5A	*
7909601		SNORA16B
7909610	AB209032	ATF3	*
7909661	AF477978	RPS6KC1
7909708	U19769	CENPF	*
7909745	BC094879	KCTD3
7909782	BC020641	RRP15
7909811
7909862	AK125403	C1orf115
7909866	BC011973	MOSC2
7909898	AK290335	MIA3
7909931	BC113635	C1orf58
7909946	AK125494	RP11-452F19.2
7909990
7910190	BC042500	ZNF678
7910241	BC006249	GUK1
7910372	BC012758|BC080645|BC008022	RNF187
7910377
7910381	AK055963	RP4-621O15.2
7910539	AY358611	C1orf124
7910585
7910636
7910638
7910640	AK025139	GGPS1
7910651	BC008654	TBCE
7910752	U73338	MTR
7910897
7910944
7910950	AF056032	KMO
7910997	BC007491	EXO1
7911017	AF250731	SDCCAG8
7911047
7911092
7911108
7911138	BC036200|BC010228|AL834246	C1orf71
7911329	BC118988|BC131690	C20orf69
7911331
7911335	S77916
7911337
7911341
7911343	AF284753|AK027429	UIMC1	*
7911347	BC118988|BC131690	C20orf69
7911376	BC012351	HES4
7911413	BC105070	TNFRSF4
7911529	BC017312	MXRA8
7911634		TMEM52
7911699	AK024162	FLJ14100
7911718	BC065369
7911720	BC000543	PEX10
7911754	AB208808	TNFRSF14
7911793	AK124865	FLJ42875
7911839	BC002611	WDR8
7911989	BC035566	RPL22
7912012	BC017365	ACOT7
7912031	BC142687	HES2
7912155
7912347	DQ217660	CASZ1
7912481	AK094316	MAD2L2	*
7912580		LOC440563
7912646	AB209147	CASP9
7912743	BC002946	C1orf89
7912750	BC043410	FBXO42
7912800	AK027791	RNU1A|RNU1A3|RNU1C1|RNU1C2|RNU1D2|RNU1F1|RNU1G3|ATG9B
7912850	AK027791	RNU1A|RNU1A3|RNU1C1|RNU1C2|RNU1D2|RNU1F1|RNU1G3|ATG9B
7912852	BC000793|BC110421	EIF1AX|EIF1AP1
7912854	AL035288	ESPNP
7912861		LOC644634
7912994	AK024480	RP1-93P18.1
7913146	BC031562	AKR7A3
7913154	AK094604
7913156	BC012171	AKR7A2
7913185
7913216	BC005919	PLA2G2A
7913319	AF012072	EIF4G3
7913357	BC117256	ECE1
7913380	uc001bep.1	LOC100133459
7913415	AF502942	USP48
7913558	BC033219	LUZP1
7913593	AK290272	TCEA3
7913609	BC060786	DDEFL1
7913712	AF419331|BX648939	FUSIP1|LOC642558
7913805	BC013362	RUNX3	*
7913852	BC000209	C1orf135
7913978	AY358864|AY364261	GPN2
7914178
7914194	BX538122	DNAJC8
7914214	BC064589	SNORA44|C1orf79
7914232	BC064375	TMEM200B
7914350
7914496
7914617	AK023758	AK2
7914648	AK292905	PHC2	*
7914764	AL833263|BC021230	ZMYM6|LOC653160|LOC100130633
7914851	AF297866	CLSPN
7914878	AY605064
7914898	BC071697|BC006241|AK001509	C1orf78
7915015	BC000107	GNL2
7915147	BC011697	FHL3
7915275
7915297	BC041479	COL9A2
7915329		LOC388621
7915347	BC035496	CITED4
7915385	M65199	EDN2
7915392	BC152563	HIVEP3
7915435	BC030524	CLDN19
7915578	BC064520|CR457348	TMEM53|C1orf57
7915592	M77838	RNU5F
7915609	DQ132441	TCTEX1D4
7915612
7915926	BC126223	STIL	*
7916018	AF242772	LOC51336
7916045	U07707	EPS15
7916077	AY360265	NRD1
7916185	BC131734	ZCCHC11
7916304	BC101799	GLIS1
7916443	BC029660	USP24
7916491
7916592	AB067502	MYSM1
7916669	DQ341187	DOCK7
7916741
7916836		SERBP1
7916910	BC008586	LRRC40
7916928	BC028840	ANKRD13C
7916969	AF065391	ZRANB2
7917052	BC034580	SLC44A5
7917088	AF022913	PIGK
7917103	BX641001	ZZZ3
7917120	AF383172	USP33
7917148	AK289865|AJ012494	C1orf80
7917156	BC017247	FUBP1	*
7917240	BC024007	CTBS
7917255	AB023140	SSX2IP
7917283	BC104891	MCOLN2
7917359	BC110898	C1orf181
7917468
7917604	BC150177	ZNF644
7917676	BC001257	GLMN
7917707	AF008915	EVI5
7917728	BC070342|U66589	FAM69A|RPL5
7917737
7917741	BC070051	TMED5
7917771	AY394925	DNTTIP2
7917779	L35546	GCLM
7917912	U20938	DPYD
7917976	AY359522|BX641109	SASS6	*
7918008	BC016675	DBT
7918294	BC127905	C1orf194
7918365
7918416	AF008203	ALX3
7918457	M85217	KCNA3
7918467	AY190122	C1orf103
7918533	AY358644	ADORA3	*
7918620
7918657	AF001846	PTPN22	*
7918725	AF220136	TRIM33	*
7918749	BC063894	DENND2C
7918759	BC022880|BC063894	BCAS2|DENND2C
7918813	X02751	NRAS|CSDE1
7918825	BC032446|X02751	CSDE1|NRAS
7918847	BC005934	RP5-1000E10.4
7918869	BC032517	NGF	*
7918911
7918955	BC013132	GDAP2
7919129
7919155
7919267	AK125616
7919269	AK027791	RNU1A|RNU1A3|RNU1C1|RNU1C2|RNU1D2|RNU1F1|RNU1G3|ATG9B
7919299	AK128227	LOC100130236
7919347	AK125616
7919349	AK027791	RNU1A|RNU1A3|RNU1C1|RNU1C2|RNU1D2|RNU1F1|RNU1G3|ATG9B
7919380	AK128227	LOC100130236
7919405
7919564
7919572
7919576	AK027791	RNU1A|RNU1A3|RNU1C1|RNU1C2|RNU1D2|RNU1F1|RNU1G3|ATG9B
7919578	AK125737|BC036435	ATG9B
7919642		HIST2H2AB
7919715	AL832674	ANP32E
7919749
7919854
7920123	AK291073	S100A10
7920191		LCE3A
7920214		SPRR2E
7920258	BC009017	S100A6
7920271	BC000838	S100A4	*
7920303	AK097132	S100A13
7920333
7920575	BC016852	PBXIP1
7920766	AF257305	ASH1L
7920810	AY335490	GON4L
7920839	U78165	RIT1
7920873		SNORA42
7921031
7921076	AK293026	GPATCH4
7921088		NES
7921119
7921220
7921237	AF343664	FCRL5
7921275	AF416904	FCRL3
7921344	BC028412	ELL2
7921462	BC132893|AK096506	VSIG8|C1orf204
7921487	AY007127	TAGLN2
7921538	BC053881	IGSF8
7921621
7921625	BC090928	SLAMF6
7921637	AF054816	CD84
7921652	U33017	SLAMF1
7921786	AF117237	PFDN2
7921834	BC005282	APOA2
7922121	BC007072	RP4-747L4.3
7922243	BC008679|CR450330	C1orf156
7922268	BC028679	KIFAP3
7922328
7922351	AK130460	LOC646870
7922400
7922404	BC038733	SNORD80|GAS5
7922406		SNORD79
7922408		SNORD78
7922410		SNORD44
7922412		SNORD77
7922416		SNORD75
7922432		RC3H1
7922456
7922474	AK292691|AL049799	LOC100129443|KIAA0040
7922590	AK125993	FLJ44005
7922637	BC101532|AK289793|AF464140	TOR1AIP2|IFRG15
7922752
7922773	BC001606	NCF2
7922823	AF288393	EDEM3
7922870	AF288399	C1orf25
7922889	AF205218	IVNS1ABP	*
7922912	U69668	TPR	*
7923007	AK225794	UCHL5
7923086	AF509326	ASPM	*
7923119	BC132818	ZBTB41
7923183	BC060820	ZNF281
7923189	BC113742	KIF14	*
7923317		ASCL5
7923360	BC012600	TNNI1
7923394	BC015408	ARL8A
7923501
7923534	BC044226	MYBPH
7923562	U62662	CHIT1
7923578	BC035281	FMOD
7923582		LOC100132728
7923635	BC152475	PLEKHA6
7923700	AF030435	LRRN2
7923810
7923917	BC006401	FAIM3
7924096	BC043502	NEK2	*
7924107	BC034621	LPGAT1
7924119	BC030716	INTS7
7924190	AL079275	ANGEL2
7924230	AK289533|BC000158	FAM108A1|FAM108A2|FAM108A3
7924327	AK001114	GPATCH2
7924351	BC126275	EPRS
7924386
7924405	BC146760	RAB3GAP2
7924463
7924551
7924582	AY221751	WDR26
7924701	AY150218	ACBD3
7924712	BC045625	LIN9
7924884	BC101837	HIST3H3
7924923	BC020107	NUP133
7925043	BC035763	EXOC8
7925128		LOC440733
7925174	AK289810	TOMM20
7925201	BC130418	ARID4B
7925244
7925364	BC065205	HEATR1
7925436
7925446
7925500	BC117360	CHML
7925523
7925525	AB022657	CEP170
7925531	AY005799	AKT3
7925561	AF448858|AK095297	LOC284702
7925622	AY157619	AHCTF1
7925672	BC005360	ZNF670
7925691	BC099661	ZNF124
7925739
7925792	X86098	ZMYND11
7925918	BC040210	AKR1C1
7925978	BC001759	C10orf18
7926123		TCEB1P3
7926150	BC037281	LOC439951
7926259	AB042719	MCM10	*
7926283	U51990	PRPF18
7926319	BC007754	SUV39H2	*
7926356	BC015092	PTER
7926531	BC024163	ARL5B
7926565	AB209755	MLLT10
7926609	BC011652	BMI1	*
7926677	AB188491	OTUD1
7926708	BC035132|CR457346	THNSL1
7926821	BC009107	MASTL
7926836	BC029350|AF532968	RAB18
7926851	AK223600	WAC
7926875	U23070	BAMBI
7926916	BX647794	ZEB1	*
7926979
7927062	BC126119	ZNF33A
7927071	BX647089	ZNF37A
7927082	AF165514	HSD17B7P2
7927089
7927095	BC118988|BC131690	C20orf69
7927108	BC150252	BMS1
7927146	AB090811	CSGALNACT2
7927169		ZNF487
7927173	BC014161	ZNF485
7927267	BC051863	FAM35A
7927288	AF131775	FAM35A
7927323	BC082258|AK291430|AK125147	FAM21B|FAM21A|FAM21C|FAM21D
7927389	BC130570	MAPK8	*
7927527
7927550		LOC100132418
7927552	AF411132|BC051717|AK160375	CTGLF3|CTGLF1|CTGLF5|CTGLF4|CTGLF2|CTGLF7|CTGLF6
7927560	BC082258|AK291430|AK125147	FAM21A|FAM21B|FAM21C|FAM21D
7927669	BC126366	TFAM
7927710	BC107750	CDC2
7927732	BC015120	ARID5B
7927786	BC068557	REEP3
7927799	BC018658	REEP3
7927814	AF083106	SIRT1	*
7927876	AF430147	TET1
7927889	AF465616	CCAR1
7927926	BC000272	DDX50
7927936	BX648405	DDX21
7927964	BC015516	SRGN
7927972	AF175266	VPS26A
7928069	M59217	COL13A1
7928147	AF358666	ADAMTS14
7928306
7928408	AK091621	KIAA0913
7928489
7928491	AF217500	MYST4
7928516	BC080593	SAMD8
7928679	BC090922	PLAC9
7928746
7928750
7928800	AF241785	KIAA1128
7928855	BC028383	BMPR1A
7928909	BC051863	FAM35A
7928959	BC005821	PTEN	*
7929032	BC012479	FAS	*
7929072	U34605	IFIT5
7929078	AB033337	MPHOSPH1
7929132	AL832496	PCGF5
7929168	AF438201	TNKS2
7929201	AF038362	BTAF1
7929258	U37426	KIF11	*
7929288	AK128190	EXOC6
7929332
7929334	AB091343	CEP55	*
7929438	AF155827	HELLS	*
7929511	AJ133133	ENTPD1
7929562	AB002333	ZNF518A
7929596	AL834245	LCOR
7929609	BC024315	C10orf12
7929649	BC007331	UBTD1
7929664	BC045550	C10orf65
7929719	AF525304	C10orf28
7929768	BC028948	CUTC
7929858	AF460991	C10orf6
7930099	BC036120	FBXL15
7930139	AF281046	TRIM8
7930181	AF226730	AS3MT|C10orf32
7930264	BC026336	NEURL
7930276	D86959	SLK
7930380	BC062559	ADD3
7930422	AK289771	SMC3	*
7930450
7930454	BC026104	PDCD4
7930470	BC050445	SHOC2
7930614	BX647641	NHLRC2
7930996	AF320223	BRWD2
7931081	BC042458	PLEKHA1
7931159	BC035344	PSTK
7931168	BC013756	ACADSB
7931181		HMX3
7931216	BC008999	KIAA0157
7931226	BC048281	ZRANB1
7931239	BC026172	C10orf137
7931268	AY064248	BCCIP
7931348		FOXI2
7931379	M29971	MGMT	*
7931500	AY181241	GPR123
7931553	AB011076	UTF1
7931681
7931754	BC057827	IDI1
7932000	BC017309	KIN
7932023	D13644	USP6NL
7932041	AB037829	UPF2
7932086
7932186	AF395748	DCLRE1C
7932308		C1QL3
7932433	BC035778	NSUN6
7932512	BC110894	DNAJC1
7932554	AF480466	ARHGAP21
7932635
7932637	BC130453	ANKRD26
7932678	AF151782	YME1L1
7932703	BC030555	ACBD5
7932794		LOC653665
7932862
7932883
7932885	AY033595	ARHGAP12
7932911	BC126279	KIF5B	*
7932938	BC036529	EPC1
7932966	BC020057	ITGB1	*
7933010	AF196185	PARD3	*
7933047	BC110901	CUL2	*
7933073	BC035898	GJD4
7933075	AB043703	FZD8
7933080
7933084	BC106046	NAMPT	*
7933092	BC132915	ZNF248
7933139	BC065181	ZNF33B
7933149	AK095136	RASGEF1A
7933237	BC048968	ANUBL1
7933252	AF411132|AK160375|BC075841	CTGLF3|CTGLF1|CTGLF5|CTGLF4|CTGLF7|CTGLF2|CTGLF6
7933261		LOC100132418
7933290	AL832069|BC075841|BC051298	BMS1P5|CTGLF7|CTGLF6|LOC642826
7933298	AK127436	SYT15
7933310		LOC100132646
7933366	AF188285	GDF2
7933372	BC028237	GDF10
7933413	AL832069|BC075841|BC051298	BMS1P5|CTGLF7|CTGLF6|LOC642826
7933469	AY324801	ARHGAP22
7933498	BC029839	C10orf73
7933501		DRGX
7933509	L04791|BC034479	ERCC6|PGBD3
7933561	BC050560	PARG
7933572		LOC100132418
7933593
7933638	AK056520	FLJ31958
7933723	BC065709	IPMK
7933760	BC036757	CCDC6
7933877	BX537954	JMJD1C
7933945
7933947	AY221963	HERC4
7933999	AF461266	RUFY2
7934026	BC111740	DNA2
7934114	BC111501	TYSND1
7934141	AF268898	NPFFR1
7934154
7934178	BC006324	PCBD1
7934215	BC023558	SPOCK2
7934278	BC034998	P4HA1
7934299	U88048
7934320	AK094162	DNAJC9
7934544	AY358476	COMTD1
7934706	AF130084
7934717	AF130084
7934719	BC022318	SFTPD
7934733	AK126287	ANXA11
7934812	AB065003	WAPAL
7934842	BC094744	MMRN2
7934870	BC073998	ATAD1
7934896
7935011	BC036444	CPEB3
7935027	BX648462	IDE
7935054
7935146	BC049850	NOC3L
7935228
7935320	AF269150	TM9SF3
7935528	AF117758	SFRP5
7935707	BC092514	CHUK	*
7935903	AY049737	NPM3
7936064	BC001595	NT5C2
7936408	D42045	DCLRE1A
7936419	BX537964	C10orf118
7936516	AB007877	HSPA12A
7936559	BC028375	PDZD8
7936567	AY037299	RAB11FIP2
7936590	BC095539	PRLHR
7936614	BC114429	EIF3A
7936637		SNORA19
7936639
7936762	BC022026	ATE1
7936826	BC022564	IKZF5
7936871	BC016928	OAT
7936884	AK127343	FAM53B
7936891	BC026167	METTL10
7936949	AF427340	DHX32
7937020		MKI67	*
7937059	BC042951	TCERG1L
7937089	AY098866	STK32C
7937150	BC115404	ADAM8
7937200	AF225903	CALY
7937247	AK126615	SYCE1|FLJ44653
7937305	AY154461	NLRP6
7937330	BC009696	IFITM2
7937335	J04164	IFITM1
7937433	L12398	DRD4
7937518	BC093031	TSPAN4
7937696	AK057910	LOC338651
7937700	AB126074	KRTAP5-5|LOC100131895
7937990
7937993
7938128	BX647806|AK074178|AB290171	CCDC35|DNHD1
7938183	AF056618	ZNF215
7938208	AK292271	RBMXL2
7938313	BC114929	IPO7
7938329		SNORA23
7938364	BX641032	WEE1	*
7938368		LOC387753
7938370	AF134894	SWAP70
7938388
7938422	BC058914	CTR9
7938448	AK092290	USP47
7938592	AY600449	MLSTD2
7938629	BC150307	PDE3B	*
7938646	BC092468	CALCB
7938652	BC127700|AB231745|AB231747|AB231746|AB231748	INSC
7938687	AK128739	NUCB2
7938702
7938730	BC064493	MYOD1	*
7938738	L00621	KCNC1
7938748		GLTPP1
7938756	AF512499	FAM10A5
7938762	BC004452	GTF2H1
7938890	BC064831	PRMT3
7939087	BC047775|AK096287|AK127509	C11orf46
7939120	AK129791	RCN1
7939150	BC063393	PRRG4
7939158	AK126023	QSER1
7939197	AF305239	HIPK3
7939329	AF001437	PDHX
7939341	AL832642	CD44	*
7939424	AY311389	API5
7939434	BC017238	TTC17
7939465	BC012043	HSD17B12
7939665	BC011704	MDK	*
7939676	BC002378|AK223603	HARBI1
7939902	AB231717|AB231716|AB231713|AB231715|AB231714	LOC646813
7939988		OR5M3
7940022	AY250221	RTN4RL2
7940028	BC011171	SERPING1
7940147	AY457926|BC130513|BC062456	FAM111B
7940153	BC071759	FAM111A
7940372	BC001309	TMEM109
7940451	BC001341	DAK
7940662	BC008100	ROM1
7940698	AK289499	TAF6L	*
7940711	BC051355	TMEM179B
7940869	AY093952	FERMT3
7940891	BC044584	DNAJC4
7940904	BC008818	VEGFB
7940914	BC091475	FKBP2
7940924	Z26649	PLCB3
7940971	AF259500	KCNK4|DKFZP566E164
7941062	BC034384	SLC22A11
7941087	BC045619	PPP2R5B	*
7941122	U79266	SAC3D1	*
7941127	AK291964	ZFPL1
7941136	AF024631	C11orf2
7941179	BC008751	CAPN1
7941272	BX538238	MALAT1
7941274	AB051427	SCYL1
7941457	U63825	CCDC85B
7941469	BC104022	TSGA10IP
7941583	BC071169	RAB1B
7941587	BC047953	CNIH2
7941608
7941743	BC015581	LRFN4
7941746	AK026328	FLJ22675
7941843	AK094226	SSH3
7941879	BC036873	TBC1D10C
7942032	AB046778	SAPS3
7942204	M98343	CTTN
7942342	Y14385	INPPL1
7942489	AY138810	DNAJB13
7942527	BC108909	POLD3
7942544		RNF169
7942551
7942594		SNORD15B
7942645
7942650	BC117265|AY070433	C11orf30
7942674	AY358317|BT007440	TSKU
7942679	AF214454	PHCA
7942715	BC069115	OMP
7942771	AK096213|AK093267	FLJ38894
7942820
7942832	AK292399|AK058145	C11orf82	*
7942839	BC146778	PCF11
7942879	BC107900	TMEM126B
7942889	BC007875	TMEM126A
7942912
7942964	BC051462	TMEM135
7942989
7943126	AK098232	KIAA1731
7943193
7943218	AF398509	PANX1
7943231	BC017798	ANKRD49
7943263	AK074084	AMOTL1
7943297	AY239292	CEP57
7943314	AF004715	JRKL
7943349	AK057372|AK023666	FLJ32810
7943369	AF247167	TMEM133
7943413	AF070674	BIRC3
7943424	BX647978	BIRC2
7943580	BC063306	CUL5	*
7943620	U33841|X91196	ATM|NPAT
7943690	AB040537	DDX10
7943715	AB096241	ZC3H12C
7943842	BC048133	C11orf57
7943882	BC018029	PTS
7943890	BC020894	LOC100132686
7944006	AF156098|AB209753	RBM7
7944152	BC028082	IL10RA
7944195	BC112367	UBE4A
7944223	L04284	MLL	*
7944365	AB094093	CCDC84
7944560	AF180681	ARHGEF12
7944656	BC012333	SC5DL
7944867
7944876	U89165	NRGN
7944952	AK128036
7945040	BC015047	HYLS1
7945158
7945342	BC118988|AL137655|BC131690	C20orf69|DKFZP434B2016
7945347
7945357	BC001042	SIRT3
7945377	BC106007	SIGIRR
7945418
7945462	AF076494	IRF7	*
7945536	BC034732	CEND1
7945595		MUC6
7945648	BC132882	KRTAP5-2
7945652	AB126072	KRTAP5-3|KRTAP5-4
7945767	BC067842	CDKN1C	*
7945781	AF035444	PHLDA2
7945803	BC002880	CARS
7945864	AF003540|AB209664	ZNF195
7945894
7945942
7946004		OR51S1
7946221	BC012088	TAF10	*
7946354	M26682	LMO1
7946516	AY234241	SBF2
7946563
7946635	BC038508|BC047754|BC017803	ZBED5
7946659
7946703	BC037280	COPB1
7946815	BC113658	PIK3C2A
7946849
7946853	BC064497	KCNJ11
7947027	AF503350	UEVLD
7947040	BC056261	SPTY2D1
7947189	BC008496|AF382034	CCDC34
7947221	BC053907	LIN7C
7947245	M30627	HSP90AA2
7947248	AY791349	KIF18A
7947268
7947332	BC023595	IMMP1L
7947396	BC108319	CSTF3
7947421
7947423
7947570	BC045666	TP53I11
7947599	BC028235	CHST1
7947624	AK023258	PHF21A
7947694	BC120869	CKAP5	*
7947928	AF329838	C1QTNF4
7947989
7948397
7948399	AL831992	PATL1
7948565	BC004391	CYBASC3
7948599	BC021187	DKFZP434K028
7948667	BC012477	AHNAK
7948775	AK055736	C11orf48
7948973	BC034222	HRASLS5
7948995	AK090822	ATL3
7949015	AB231752	MGC3032
7949021	BC023587	RCOR2
7949033	AF202922	MACROD1
7949060	BC094817	PPP1R14B
7949080	AB035266	NRXN2
7949327	BC106951|BC106952|AK093130|BC033501	LOC283129
7949340	BC012330	BATF2
7949371	AK124141	LOC399904
7949400	AY597807|BX648573	SLC25A45
7949410		MALAT1
7949490	BC109109	DKFZp761E198
7949540	BC013185	C11orf68
7949577	AK291124	YIF1A
7949637	AK290084	MRPL11
7949645	AY358448	ZDHHC24
7949679	AB008567	SPTBN2
7949746	AB209274	POLD4
7949796	AY569571	GPR152
7949808	BC022230	PITPNM1	*
7949836	BC002850	CDK2AP2
7949843	AF169154	CABP2
7949857	BC018644	NUDT8
7949931	BC002522	SUV420H1
7949971	AK172798	CPT1A
7950119	BC001706|CR457247	C11orf59
7950128	BC005393	C11orf51
7950136	BC041564	PHOX2A
7950140	AF229166	LOC220077
7950307	AK025742	UCP2
7950336	AB231764|AL833903	C2CD3
7950370
7950391	AB019210	PGM2L1
7950420		LOC387787|LOC100134292
7950423
7950501	BC018771	GDPD5
7950544	AF081567	PRKRIR
7950606	AF380176	RSF1	*
7950726	AK095054	MGC33846
7950743	BC014213	RAB30
7950796	BC060807	CREBZF
7950895
7950921	D28539	GRM5
7950983	AK226099	CHORDC1
7950990	AY162216	SLC36A4
7951008	CR457369|AK027016	JOSD3
7951030		SNORD6
7951032		SNORA1
7951034	AK128061	SNORA8|JOSD3
7951036	AK128061	SNORD5|JOSD3
7951038	AK128061	SNORA40|JOSD3
7951046	AF022778	MRE11A	*
7951068	BC040946	CWC15
7951077	BC017296	SESN3
7951091
7951093	BC028727	FAM76B
7951108	AF364863
7951112	AB028996	MTMR2
7951131
7951144	AK074306	CCDC82
7951207	BC032296	TMEM123
7951345
7951408	AK125640	COP1
7951422	BC041118	KIAA1826
7951437	Z50053	GUCY1A2
7951447	AK293001	CWF19L2
7951467	BC015183	ALKBH8
7951497	D83243	NPAT	*
7951554	DQ916738	RDX
7951591
7951701
7951703	BC021195	DRD2
7951752	AF266283	USP28
7952022	AY138965	AMICA1
7952103	D17532	DDX6
7952132	AB209026	SLC37A4
7952179	BC011694	H2AFX	*
7952274	AF060231	PVRL1
7952305	uc001kdz.1	LOC283155
7952341	AY326422	ASAM
7952388		OR10G7
7952445	BC064919|AK092413|AL512691	C11orf61
7952451	BC040288
7952522	BC004822	PUS3
7952577	AB058770	KIRREL3
7952733
7952953	AF061944	WNK1
7952986	BC130467	HSN2
7952988	BC150248	ERC1
7953200	D13639	CCND2	*
7953211	AY425618	C12orf5
7953218	BC016330	RAD51AP1
7953291	AY966455	CD9
7953333	BC012160	CD27
7953341	BC015017	TAPBPL
7953383		SCARNA10
7953390	U80760
7953409	BC017025	PTMS
7953547	BC051795	ATN1
7953569	M77273	PTPN6
7953763
7953878	BC019883	CLEC2D
7953965	BC087847
7954104	BC063855	ATF7IP
7954279	BC022220	AEBP2
7954382	AK125461	PYROXD1
7954388	AB097020	GOLT1B
7954419	AF207600	ETNK1
7954434
7954436	BC126417	LRMP
7954492	BC032143	FGFR1OP2
7954511	BC028603	STK38L
7954711	AB046771	C12orf35
7954752	AF000430	DNM1L	*
7954777	AY845858|BC033730	ALG10|ALG10B
7954789	AY845858|BC033730	ALG10B
7954963
7954997	BC098410	TMEM16F
7955019	DQ096628	ARID2
7955112	AY302593	H1FNT
7955297	BC032946	AQP5
7955361	AK291746	LARP4
7955376	AK091597	DIP2B
7955419
7955425	BC029619	ATF1
7955464	AY430097	DAZAP2
7955551	BX647684	ANKRD33
7955694	BC010162	IGFBP6
7955702	AF059203	SOAT2
7955736	D79987	ESPL1	*
7955777	AF289485	C12orf10
7956013	D64007	BLOC1S1
7956220	BC006171	OBFC2B
7956426	AF412024	INHBE
7956522	AF063608	KIF5A
7956573	AK122981	SLC26A10|GEFT
7956623	BC050397	2009-03-01
7956658	BC030693	SLC16A7
7956670	AF106069	USP15
7956697	BC151241	MON2
7956795	AF191838	TBK1
7956842	AF112299	LEMD3
7956894	AK290894	HELB
7956908
7956910	AB020636	CAND1
7956930	BC005809	DYRK2
7956937	BC078173	RAP1B|hCG_1757335
7956949	BC043343	NUP107
7956987		PRO2268
7956989	AK290341	MDM2	*
7957106	AF044215	CNOT2
7957177	AF091035	RAB21
7957186	BC028352	TBC1D15
7957260	BC012510	GLIPR1
7957275
7957277	AB024494	ZDHHC17
7957467	BX537868	C12orf29
7957478	BX538169	TMTC3
7957510	BC107813|BC105728|BC043363	LOC338809
7957530
7957536	uc001tcn.1	NUDT4
7957540	BC040240	MRPL42
7957549	AK094874
7957568
7957570	AF030339	PLXNC1
7957613	AK225303	VEZT
7957633	BC013782	METAP2
7957665	BC017371	ELK3
7957715	AK315821	NEDD1	*
7957737	AB209297	TMPO	*
7957759	AF013263	APAF1	*
7957793	AK124075	ACTR6
7957806	BC063798	SCYL2
7957890	AF072718	UTP20
7957962	AF518404	SPIC
7958031	BC098313	C12orf48
7958130	AB209534	HSP90B1
7958158	AF117210	HCFC2
7958197	BC066319|AY779046	RPL18A|LOC390354
7958216	BC104992	KIAA1033
7958275	AY092084	POLR3B
7958375
7958453
7958692	AK092775	TCTN1
7958842
7958846	AK289854	PTPN11	*
7958884	AY730627	OAS1
7958989	BC030618	P76
7959100
7959195	BC030201	CABP1
7959249
7959251	BC121158	P2RX7
7959408	BC150278	KNTC1	*
7959473	AB014731	DENR
7959482
7959761	BC042102	FAM101A
7959848
7959850	BC070037	FZD10
7959880
7959925
7959995	AY044869	EP400	*
7960052		SNORA49
7960134	BC046206	ZNF26
7960143	BC036656	ZNF84
7960158	BC024182	ZNF10
7960221		JARID1A
7960338
7960355
7960381	CR627161
7960407	BC121097	FGF6
7960411	AK074479	C12orf4
7960728		SCARNA12
7960730	BC065194	MBOAT5
7960865	AB209607	SLC2A3
7960896	AF359416	LOC650293|OR7E125P
7960898		OR7E125P
7961069	BC093857	CLECL1
7961208	AK096106	MAGOHB
7961279	BC103699	TAS2R14
7961291	BC117421	TAS2R44
7961339	BC117136	LRP6
7961363
7961381	AK074729	GPR19
7961622
7961654	L36140	RECQL	*
7961767	BC117143|BC042498|AY166851|BX648560	KIAA0528
7961829	AK056255	BCAT1	*
7961865	M54968	KRAS	*
7961887
7961900	D26350	ITPR2
7961964	BC003081	C12orf11
7962013	AL834128	ERGIC2
7962058	BC042083	TMTC1
7962083
7962085	U77494	IPO8
7962151	BC068580|BC020855|AK125323	MGC24039
7962183	CR456830	AK3L1|AK3L2
7962274	AY368076	KIF21A
7962349	BC030023	GLT8D3
7962367	BC022543	ZCRB1
7962427	BC068502	PUS7L
7962441	AK127868	TWF1
7962499	AF030234	SFRS2IP
7962516	BX647547	SLC38A1
7962537	AF298897	SLC38A2
7962590	BC056415	RPAP3
7962827		SNORA2A
7962829		SNORA2B
7962831	AF045161	CCNT1
7962904	M74491	ARF3
7962918	U81787	WNT10B
7962951	AF010403	MLL2
7963137
7963263
7963265	AL832881	POU6F1
7963421	BC008807	KRT6A
7963614	BC015916	ITGB7
7964260
7964303	AF537113	TAC3
7964388	AK094275	NDUFA4L2
7964400	BC008069	STAC3
7964413	AB023219	R3HDM2
7964460	BC003637	DDIT3
7964718
7964757	BC051889	RBMS1
7964832
7964937	AB011118	CCDC131
7965022	BC033887	KRR1
7965060	BC026355	BBS10
7965064	AF392452	OSBPL8
7965090	AY349166	CSRP2
7965094	BC017481	E2F7
7965112	BC007018	PAWR	*
7965123	AF458589	PPP1R12A
7965152
7965200	AF213377	CCDC59
7965359	J04027	ATP2B1
7965436	L40157	EEA1
7965478
7965486	AF155115	CCDC41
7965510	BC040535	TMCC3
7965650
7965652	BC033005	PCTK2
7965675
7965723	BC127017	UHRF1BP1L
7965760	AK090824	DEPDC4
7965789	BX537387	ARL1
7965812	AY687932	GNPTAB
7966026	BC152462	NUAK1
7966068
7966259	BC009932	GLTP
7966299
7966343
7966462	BX641140	C12orf30
7966488	AK054654	C12orf51
7966570	AF478457	DDX54
7966706	AY338463	MED13L
7966749	AK000614	TESC
7966851	AF181985	TAOK3
7967025	AF258551
7967028		RNU4-2
7967089
7967127	AF287630	CAMKK2	*
7967202	AF239923	RHOF
7967210	BC038786	LOC338799
7967255	M97501	CLIP1	*
7967304	BC067773|AB212664	RSRC2
7967386	AK096541	MPHOSPH9	*
7967420	BC133704	SBNO1
7967486	BC017186	CCDC92
7967698
7967702	AK127893
7967705
7967707
7967789	BC009836	PXMP2
7967863	AL832623	ZNF605
7967872
7967881	BC003542	MPHOSPH8
7967900	BC036372	ZMYM2	*
7967933	AK126668	IFT88
7968029	BC015452	PCOTH
7968126		LOC390387
7968132	BC001104	NUPL1
7968199	BC107601	CDK8
7968232		SNORD102
7968252
7968333	BC038103	USPL1
7968417	BX537670	FRY
7968484	U43746	BRCA2	*
7968516	U95825	PDS5B
7968711	BC051723	COG6
7968746	AF071185	WBP4
7968761	AK291248	NARG1L
7968798
7968800	AB078968	DGKH
7968835	AF176555	AKAP11
7968890	BC041770	DGKZ	*
7969017	L41870	RB1	*
7969048	AK097860
7969060	BC132812	FNDC3A
7969091
7969093	AY603964	MLNR
7969096	AY027525	CDADC1
7969114	AF334407	SETDB2
7969129	AB011031	PHF11
7969145	AF441378	ARL11
7969153	AY455758|AY169387	TRIM13|KCNRG
7969166	AY169387|AY455758	KCNRG|TRIM13
7969228	BC142998|BC122536	ALG11|UTP14C
7969241
7969243	AY062261	CKAP2	*
7969271	BC000911	SUGT1	*
7969339
7969341	BX537910	TDRD3
7969368
7969370
7969372
7969374	AK291496	C13orf34
7969390	AF330046	PIBF1
7969477
7969626	AK289850	GPR180
7969651	BC047936	DNAJC3
7969671
7969677	AF061261	MBNL2
7969693	BC041333	RAP2A
7969703	BC045640	IPO5
7969772
7969794	AY358798	UNQ1829
7969830	AF193855	ZIC2
7969835	AF385926	PCCA
7969881	M73047	TPP2
7969935	BC031522	ERCC5
7970139	BC029889	C13orf16
7970329	AK126533	GAS6	*
7970370	AY013250	UPF3A
7970392
7970426
7970428	AJ133355	ZMYM5
7970473	BC113571	XPO4
7970513	AF361358	C13orf3
7970546	BC031089	EFHA1
7970565
7970569	AK125458	SACS
7970595	BC110413|BC040438	MIPEP|RP11-45B20.2
7970602	AF158255	PARP4
7970624	AF139625	CENPJ
7970655	BC040012	MTMR6
7970681	BC034688	RNF6
7970696	AF022789	USP12
7970763	AF063657	FLT1	*
7970828	AB064667	OK/SW-CL.58
7970842
7970844	AK097423	KATNAL1
7970858	AK122825	HMGB1
7970864	BC037553	HSPH1
7970907	BC010643|BT007172	N4BP2L2
7970949	BC028170	MAB21L1
7971015	BC067766	SMAD9
7971124		UFM1
7971177	AF032885	FOXO1	*
7971197	BC030507	ELF1
7971222	AK055086	MTRF1
7971246	BC053674	KIAA0564
7971388	AK094133	SLC25A30
7971422	AY283618|AB020660	ZC3H13
7971541	AB035863	SUCLA2
7971550	AF300618	MED4
7971563	BC022001	PCNP
7971590	BC010993	CAB39L
7971602	AF334406	RCBTB1
7971620	BC035090	KPNA3
7971653	BC055417	DLEU2
7971692	AF097645	INTS6
7971866	AY750055	DIAPH3	*
7971967	AF330044	DIS3
7972003	AF330041	KLF12
7972062	BC072448	FBXL3
7972069	AF075587	MYCBP2
7972180	AK098640	RNF219
7972190	BC111739	RBM26
7972215
7972217	BX648582	SPRY2	*
7972269	BC033675	TGDS
7972297	AY207008	ABCC4
7972426
7972557	BC020752	EBI2
7972733
7972737	BX648833	LIG4	*
7972743
7972805	BC026025	RAB20
7972828	AK000100	ANKRD10
7972902	BC009755	ADPRHL1
7972973	AF287261|AY064546	SETD8	*
7973363	BC035663	REM2	*
7973724	BC065283	KIAA1305
7973745	BC050072	FOXG1	*
7973756	BC000973	KIAA1333
7973770	AK290410	SCFD1
7973871
7973896	AK027791	RNU1A|RNU1A3|RNU1C1|RNU1C2|RNU1D2|RNU1F1|RNU1G3|ATG9B
7973902	BC000652	SRP54
7973948	BC006250	BRMS1L
7974066	AK292579	PNN	*
7974125	BX648723	KIAA0423
7974146	BC028683	PRPF39
7974164
7974166	DQ140356	FANCM
7974303	AY358640	TXNDC1
7974380	AF006305	PSMC6
7974387	BX647636	STYX|LOC730432
7974425	BC121173|AF429970	SAMD4A
7974447	BC060790	SOCS4
7974471
7974483	AY264265	KTN1
7974533	BC009476	PELI2
7974542	AK293099	C14orf101
7974566	BC013174	C14orf108
7974576	BC118589	NAT12
7974621	AF086075	ARID4A
7974653	AB011158	KIAA0586
7974697	BC038428	DAAM1
7974771	AK023008	C14orf135|LOC100130173
7974793	BC069413	SIX6
7974799	BC000820	MNAT1	*
7974851	BC012527	HIF1A	*
7974920	AF435011	SYNE2
7975068	BC050719	ZBTB1
7975203	AL832326	MPP5
7975224	BC002513	EIF2S1
7975412		TTC9
7975416	AF233450	PCNX
7975457	AK090477
7975459	AF090990	SIPA1L1
7975521	AL832314	RBM25
7975595	AK025455	C14orf169	*
7975598	DQ082754	ACOT1
7975616	BC005343	DNAL1
7975632	BC059364	ZADH1
7975787	BC051303	JDP2	*
7975932		TMEM63C
7975987
7975995	BC113986	C14orf178
7976080	BC035633	GPR65
7976101	BC011793	ZC3H14
7976158		hCG_2040201
7976243	BC070095	CPSF2
7976307	AF085199	GOLGA5
7976443	BC015492	IFI27
7976544	AB018563	TCL1B|TCL6
7976571	AK094654	C14orf129
7976598	BC036014	PAPOLA
7976621	BC103761	VRK1	*
7976642	U88895
7976669	AY358173	HHIPL1
7976848
7976876	AB290157	DYNC1H1
7977003	AF155595	RCOR1
7977058	BX537367	EIF5
7977075		SNORA28
7977077	AF465413	MARK3
7977234	BC041103	C14orf180
7977249	DQ395339	INF2
7977270	AK131040	LOC388022
7977319	BC015003	PLD4
7977373	BC142941	MTA1
7977397	BC034151	CRIP2
7977432	BC004221	TMEM121
7977507		RPPH1
7977674	AK091676	SUPT16H
7977693	AB046784	CHD8
7977761	BC024245	SALL2
7977771		OR10G2
7977868	BC014299	C14orf93
7978107	M95925	NRL
7978360	BC027974	GZMH
7978428	U17989	STRN3	*
7978449	AY254380	HECTD1
7978542	AK289549|AB032969	KIAA1143
7978544	AK025273	EGLN3
7978568	AK027791	RNU1A|RNU1A3|RNU1C1|RNU1C2|RNU1D2|RNU1F1|RNU1G3|ATG9B
7978570	BC001798	SNX6
7978595	AF213467	BAZ1A	*
7978739	BC030604	TRAPPC6B
7978760	AK289855	KLHL28
7978776	BC065544	C14orf106
7978824	BC015974	RPS29
7978833	BC107716	RPL36AL
7978866	BX648598	SDCCAG1
7978932	BC117261	SOS2
7978997	BC036013	MAP4K5
7979044	AF212162	NIN
7979179	AF081886	ERO1L
7979223	BC030703	DDHD1
7979260	BX647679	GMFB
7979281	BC063041	WDHD1
7979307	AB076695	DLG7
7979367	U85946	EXOC5
7979412
7979516	BC108284	TRMT5
7979551	BC092477	PPP2R5E
7979565	BC010698	WDR89
7979721	AK090706	C14orf83
7979725	BC071849	PIGH
7979732	AF060902	VTI1B
7979862
7979870	AF284217|BC105025	C14orf162
7979876		LOC100130174
7979906	AF226729	C14orf112
7979980
7980140
7980246	AF195657	MLH3	*
7980309	AF134159|AF136971|CR533443	C14orf1
7980425	AK056709	THSD3
7980438	BC005123	SPTLC2
7980496	BC045834	C14orf145
7980523	D14887	GTF2A1
7980547	AB020335	SEL1L	*
7980700
7980720	BC035865	TTC7B
7980773	BC035914	CCDC88C
7980833	BC038932	SMEK1
7980923	AF007217	TRIP11
7980940	BC095402	ATXN3
7980970	BC018192|AY129028	ITPK1|LOC100130685
7980998	AK291422	BTBD7
7981011
7981051	AF181467	SERPINA10
7981084	AY220118	SERPINA9
7981111	AB028449|AJ132261	DICER1	*
7981181		SNHG10|SCARNA13
7981192		ATG2B
7981215
7981217		ATG2B
7981266	BC031990|AK123840	C14orf65|LOC100128667
7981320	AK126659	MEG3
7981335	BC121062	HSP90AA1	*
7981387	BC155541	CDC42BPB
7981425
7981488	AF462446
7981566	AK128196	NUDT14
7981714
7981720	uc002eds.1|uc002edj.1
7981724	BX647160
7981728
7981771
7981781	BC062994	OR4M2|LOC727924
7981798	AF272884	TUBGCP5
7981824	AY763577	CYFIP1
7981872
7981893
7981917		C15orf2
7981949		SNRPN|SNORD116-1
7981953		SNRPN|SNORD116-3|SNORD116-9|SNORD116-5|SNORD116-7|SNORD116-8
7981958		SNRPN|SNORD116-5|SNORD116-7|SNORD116-3|SNORD116-9
7981960		SNRPN|SNORD116-6
7981962		SNRPN|SNORD116-5|SNORD116-7|SNORD116-3|SNORD116-9
7981966		SNRPN|SNORD116-3|SNORD116-9|SNORD116-5|SNORD116-7|SNORD116-8
7981976		SNRPN|SNORD116-14
7981978		SNRPN|SNORD116-15
7981982		SNRPN|SNORD116-17|SNORD116-19|SNORD116-15|SNORD116-16|SNORD116-18|SNORD116-21|SNORD116-22|SNORD116-14|SNORD116-20
7981986	AF400487	SNRPN|SNORD116-17|SNORD116-19|SNORD116-15|SNORD116-16|SNORD116-18|SNORD116-21|SNORD116-22|SNORD116-14|SNORD116-20
7981988	AF241255	SNRPN|SNORD116-20|SNORD116@
7981990	AF241255	SNRPN|SNORD116-21|SNORD116@
7981996		SNRPN|SNORD116-24
7982152
7982154	BC047911|AF041080|AF041081|BC033888	HERC2P2|LOC283755|LOC440248|HERC2P3
7982228
7982250
7982256	AK093104	GOLGA9P
7982267
7982269
7982282
7982284		GOLGA9P|LOC643699|LOC728498|LOC653720|LOC728080|LOC653061|LOC653073
7982287	BC105788	ARHGAP11B
7982290
7982294		LOC390561
7982307
7982339	AK097050	LOC100130857
7982358	BC039563	ARHGAP11A
7982663	AF107297	BUB1B	*
7982745	BC049214	CHST14
7982757	AF173994	CASC5
7982805	AK223430	GCHFR
7982829	AY358969	SPINT1
7982904	BC015052	RTF1
7982957	BX648098	MGA
7983132	AK122666	LOC645106
7983191	BC075857	ADAL
7983206	BC012801	TUBGCP4
7983228	U38292	MAP1A
7983290	BC008214	SERF2|HYPK
7983321	BC063480	CASC4
7983335	BC035744|AY364237	CTDSPL2
7983350	U97670	EIF3J
7983502	AK128626	PLDN
7983638	BC093073	DTWD1
7983650	D88308	SLC27A2
7983663	BC110590	USP8	*
7983679	BC126308	AP4E1
7983734	BC036184	TMOD2
7983744	BC020542	TMOD3
7983763	BC035492	MAPK6
7983771
7983843	AL831981	TCF12
7983940	AB075509	FAM63B
7983953	BX538130	RNF111
7983991	BC022537	FAM81A|LOC100130999
7984008
7984011	AK290944	FOXB1
7984112	AB038995	RAB8B
7984213
7984330	BX640701	ZWILCH	*
7984540	BC051826	KIF23	*
7984562	AY303789	RPLP1
7984620
7984626	AK292298	SENP8
7984641	BC051877	ARIH1
7984660
7984799		LOC554175
7984908	BC018026|AK074096	CPLX3|LMAN1L
7984932	AK127480	SCAMP5
7984989	BC033744	COMMD4
7985044	BC017708	UBE2Q2
7985166	BC117481	IREB2
7985221		LOC646934
7985224	BC141940	LOC646938
7985266	AF202635
7985349	AY007810	MESDC1
7985431	AF316855|BC065260|BC007811|BC096759|BC071951|AK291684|BC054509|AK026448|AK074778	FLJ22795|LOC727751|LOC727849|LOC388152|LOC729353|LOC388161|LOC727994|LOC728125
7985555		LOC727963
7985695	AB055890	AKAP13
7985809	BC019248	ABHD2
7985829	EF567077	FANCI
7985918
7986001		LOC728477
7986010	BC139731	IQGAP1
7986068	U39817	BLM	*
7986248	AY358245	UNQ6190
7986250	AF006514	CHD2
7986323	AF182076	GLTSCR2
7986327
7986348
7986350	BC028704	ARRDC4
7986359	AB425196	IGF1R	*
7986385	BC151243	DMN
7986411	AL831995	MEF2A
7986442
7986463	DQ013130	LRRK1
7986515	uc002bxt.1|uc002byg.1|uc002cag.1|uc002cbf.1|uc002cbt.1|uc002bzz.1|uc002ccd.1
7986525	uc002byg.1|uc002cag.1|uc002cbf.1|uc002cbt.1|uc002bzz.1|uc002ccd.1
7986561
7986569	BC000975|BC033888	LOC283755|HERC2P2
7986661
7986675	BC103705|AB089319	NIPA1
7986701	BC047911|AF041080|AF041081|BC033888	HERC2P2|LOC283755|LOC440248|HERC2P3
7986755	BC063834	MAGEL2
7986769	U84404	UBE3A
7986822	BC010641	GABRB3
7986943
7986945
7987025
7987027	AK093104	GOLGA9P|LOC390561
7987048	BC063296	MTMR10
7987097
7987112
7987163
7987180	AL136908|BC026234|AK293021|AL833631|AK021466	C15orf29
7987192	DQ138323	SLC12A6
7987325	BC127111	AQR
7987361	BC071603	ZNF770
7987405	AF081195	RASGRP1
7987475	AB209583	PLCB2
7987892	AF205632	ZFP106
7987981	BC113505	UBR1
7988077	BC015949	LCMT2
7988082	AF525399	ZSCAN29
7988091
7988093	BX537418	TP53BP1	*
7988132	BC129932	STRC
7988163	BC064387	CATSPER2
7988208	BC047442	CATSPER2P1
7988286	BC153879	SPG11
7988424
7988537	BX648822	CEP152
7988581	BC033001	KIAA0256
7988605	AF084260	COPS2	*
7988713	AF346629	TRPM7
7988789	AF389880	DMXL2
7988838	AY302186	LEO1
7988921	U90942	MYO5A
7988970	BC040548	KIAA1370
7989013	AF165521	C15orf15
7989037	AF212228	CCPG1
7989073	AY630258	PRTG
7989128	uc003hkt.1	CNOT6L|LOC729530
7989132	BC112936	RFXDC2
7989144
7989193
7989224	AF009615	ADAM10
7989253	AK291423	SLTM
7989323	BC002461	BNIP2
7989347	AF502591	NARG2
7989387	BX648470	VPS13C
7989473		FAM148B
7989489
7989516	U50078	HERC1
7989628	BC130613	CSNK1G1
7989657		UNQ353
7989759	BC006389	PARP16
7989770	BC042054	PUNC
7989806	AY354202	DPP8
7989849	AF534403	DENND4A
7989885	BC107769	LOC646358
7989968	BC009516	CALML4
7990027	BC132845|AK021784	C15orf28
7990092	AF117888	MYO9A
7990442	BC002497	RPP25
7990511	M83738	PTPN9
7990582	AF242528	SCAPER
7990632	AK127658	SGK269
7990652
7990712	AK096006
7990729	BC096080	CHRNB4
7990736	BC061631	ADAMTS7
7990879		EFTUD1
7990952	AF316855|BC065260|BC007811|BC096759|BC071951|AK291684|BC054509|AK026448	FLJ22795|LOC727751|LOC727849|LOC388152|LOC729353|LOC388161|LOC727994|LOC728125
7991057	AF355402	BTBD1
7991138	BC007407	NMB
7991214	AK090766
7991216	BC073867	DET1
7991234	AY141974	MFGE8
7991401	AK057584	HDDC3
7991451
7991453	BC060873|BC110328	LOC400451
7991459	BC015886	RGMA
7991540
7991566	AB083157	LINS1
7991598	BC067846|AK290078	SNRPA1
7991638
7991640	BC132671	TARSL2
7991661
7991735	BC001381	C16orf33
7991754	CR456848	HBZ
7991772	BC056686	HBQ1
7991837	BC004880	NME4
7991846	BC010740	DECR2
7991893	BC016613	LOC146325|FLJ36208
7992038	BC000662	METRN
7992043	BC001181|AK123186	C16orf24
7992071	BC003512	MSLN
7992197
7992269
7992271	BC017188	TELO2
7992388	BC008005	NUBP2
7992402	BC007509	NDUFB10
7992529	AY569455	TRAF7
7992552	BC052292	GBL
7992584	BC035205	DNASE1L2
7992639	BC112389	TBC1D24
7992692	AB016092	SRRM2
7992716		TESSP1
7992744	BC028572	FLYWCH1
7992756
7992758	BC009383	KREMEN2
7992775	BC033703	PAQR4
7992828	BC009401	IL32
7992861
7992867	AK096958	FLJ39639
7992877	BC119652|BC150306	ZNF75A|LOC100128510
7992893
7992897	U31248	ZNF174
7992934	BC064332	DNASE1
7992987	BC002396	HMOX2
7993165
7993167	BC033891	ATF7IP2
7993265	AK025430
7993310	AY374297	MKL2
7993349	AF132984|BC008178	NPIP|LOC440350|LOC339047|LOC100132540|LOC100132620
7993359	AF132984|BC008178	NPIP|LOC440350|LOC339047|LOC100132540|LOC100132620
7993404	BC008178|AK160377|AK131084	NPIP|LOC440350|LOC339047|LOC100132540|LOC100132620|LOC399491
7993453	BC061514	MPV17L
7993546	BC039707|BC046145|BC008178|AK160377|AK131084	NPIP|LOC440350|LOC339047|LOC100132540|LOC100132620|LOC399491
7993580	AF132984|BC008178|AK131085	NPIP|LOC440350|LOC339047|LOC100132540|LOC100132620|LOC399491
7993664	BC036654	CP110	*
7993798
7993846
7993999	BC063703	LOC595101|DKFZp547E087|LOC440354
7994006	BC063703|BC090929|D86974|BX640895	LOC595101|LOC440354|LOC641298|LOC440345
7994161	AB112074	RBBP6
7994187	AY035864	TNRC6A
7994265
7994269	BC027911|AY345239	JMJD5
7994280		IL4R	*
7994518	BC038961	SPNS1
7994535	BC011563|AB209402	LAT|SPNS1
7994565	BC104660	RRN3|LOC653390|LOC730092
7994675	BC126321	ASPHD1
7994889	BC159099	SRCAP
7994961	BC064416	CTF1
7994981	BC015555	ORAI3
7995088	AK131485	TRIM72
7995252	BC018134|BC055408|AK128671	ZNF720
7995258	BC127088	ZNF267
7995308
7995310	BC029861	MGC34800
7995320
7995324
7995326
7995328
7995330
7995332
7995336
7995338
7995344
7995382	BC033657	PHKB
7995477
7995479	AK097589	PAPD5
7995552	AK292975	CYLD	*
7995583	DQ333316	CHD9
7995631	BC034490	RBL2	*
7995714	BC060831	SLC6A2
7995729	BC131699|BC009706	CES4|CES1|LOC652708
7995829	BC008408	MT1H
7995976	BC053658	CPNE2
7996034	BC069107	CCL17
7996051	BC028157	POLR2C
7996260
7996318	AF479813	CMTM3
7996455	BC033180	E2F4	*
7996569	AF370400
7996647	BC015626	PARD6A
7996759
7996883	BC021853	HAS3
7996943
7996954	AF346509	NFAT5
7997239		LOC440350|LOC440348
7997257	AK291372	ZFP1
7997264	BT007356|BC073145	CTRB1|CTRB2
7997396	AB007891	ATMIN
7997427	AY172689	CMIP
7997542	AY299331	NECAB2
7997569	BC033491	ADAD2
7997582	AF302109	WFDC1
7997700
7997767	AF488691	ZFPM1
7997904	AK023048	FLJ12986
7997909	BC036104	SPG7
7997940	AK026501	SNORD68|RPL13
7997942	BC064577	CPNE7
7998055	BT006971|AK024232	MC1R|TUBB3
7998072	BC015482	DEF8
7998117	BC118988|AL137655|BC131690	C20orf69|DKFZP434B2016
7998233	AB045292	TMEM8
7998249
7998267	DQ074695|BC073785	LOC339123
7998351		MPFL
7998399
7998405	AK056814	FLJ32252
7998457	BC000150	UNKL
7998494	BC061641	LOC645811
7998577	BC000250	NME3
7998666	BC063011	SNORA64|RPS2
7998722		SNORD60
7998759		LOC283871
7998852	BC013306	TCEB2
7998861	BC036846	PRSS33
7998878	AB010779	PRSS22
7998927
7999112	BC005024|AL833954	Magmas|CORO7
7999160	DQ167023	C16orf5
7999362
7999423	AK127621	SOCS1	*
7999431		PRM3
7999433
7999496	AY163807	ZC3H7A
7999520	AY154473	RSL1D1
7999588	U95301	PLA2G10	*
7999614	AF132984|AK131084	NPIP|LOC440350|LOC399491|LOC339047
7999634	AF132984	NPIP|LOC339047|LOC100132540|LOC100132620
7999642	BC139919	KIAA0430
7999725
7999769	BC039707|BC046145|BC008178|AK160377|AK023376	NPIP|LOC339047|LOC100132540|LOC100132620|LOC399491
7999841	AF395444	SMG1
7999884
8000003		THUMPD1
8000013	BX648185	EXOD1|DCUN1D3
8000131	BC061522|BC036263|BC008178|AK128772|AB209632|D86974	DKFZp547E087|LOC23117|LOC440350|LOC339047|LOC613037|LOC100132247|LOC100132540|LOC100132620|NPIP|LOC348162|LOC440345
8000156	BC090929|D86974	LOC595101|LOC440354|LOC641298|LOC440345
8000167	BC071656|BC063703|BC055086|BX640895|AK289905	SLC7A5P1|IMAA|LOC595101|DKFZp547E087|LOC440345|LOC440354|LOC641298
8000200	BC104660	RRN3|LOC730092
8000217	BC055086|BX640895	LOC595101|LOC440354|LOC641298
8000222		DKFZp547E087|LOC595101|LOC440354
8000329	BC044254	PALB2
8000399	BC130007	ZKSCAN2
8000501		LOC440350
8000537		LOC440350|LOC440348
8000567	BC062422	IL27
8000590	AB209149	SULT1A1
8000632
8000636	BC094882|AB209632|D86974	LOC440350|LOC23117|LOC100132247|DKFZp547E087|LOC348162|LOC440345
8000638	BC090929|D86974	LOC641298|LOC440345
8000649
8000651	BC063703|AF271775|AK027255|BC055086	BOLA2|BOLA2B|SLC7A5P1|LOC595101|LOC440354|IMAA|DKFZp547E087|LOC440345|LOC641298
8000687	BC090929|D86974	LOC595101|LOC440354|LOC641298|LOC440345
8000690
8000692	AF271775|BC063703|AK027255|BC090929	BOLA2|BOLA2B|LOC440354|LOC595101|LOC440345|LOC641298
8000757	BC055284	DOC2A
8000791	BC050664	YPEL3
8000811	BC013992	MAPK3	*
8000823	BC090929|D86974	LOC595101|LOC440354|LOC641298|LOC440345
8000834	BC063703|BC055086|BX640895	LOC595101|DKFZp547E087|LOC440354|LOC641298
8000897
8000906	BC008821	ZNF764
8000948	BC058863	BCL7C
8000998	AY466113	VKORC1
8001007	L41351	PRSS8
8001030	AB023416	PYCARD
8001147		RAB43|ISY1
8001149	AF186382	VPS35
8001211	AF503339	ITFG1
8001423		RPGRIP1L
8001449	AY335943	IRX3
8001457	S73751	CES1
8001529
8001693	BX537840	CNOT1
8001746		SNORA46
8001816	AK130753	FLJ27243
8001841	BC025959	DYNC1LI2
8001876	U50939	NAE1	*
8001946	BC080183|AK092303	LOC653319|LOC100130525|LOC100134333|EXOC3L
8002102	AF090894
8002209
8002333	BC090929|AK128245	LOC641298|LOC729513
8002342
8002344	BC052252	EXOSC6
8002379
8002403	AB115770	ABBA-1
8002533	BC007256	ZNF23
8002618	BC012116|BC004563	ZNF821
8002760		LOC100132346
8002882	AF280086	CHST6
8003068	BC005242	MPHOSPH6	*
8003171	BC010039	COTL1
8003230	BC043250	DKFZp434O0320
8003332	BC000011	MVD
8003344	BC107058	SNAI3
8003401	BC107151	APRT
8003448	AY373756	ANKRD11
8003484	AB018551	C16orf7
8003758	BC064638	PAFAH1B1	*
8003810
8003846	AK074369	LOC730889
8003875	BC041772	SPNS2
8003939	BC069519	TM4SF5
8003948		GLTPD2
8004081	BC142962	ZFP3
8004111	BC041700	RABEP1
8004144	AK289939	MIS12	*
8004331	AY646650|BC018543	KCTD11|CENTB1
8004428	BC131696	AMAC1L2|AMAC1L3
8004431	X63564	POLR2A	*
8004506		SNORA48
8004571	U66406	EFNB3
8004802	AF116704
8005157	BC068197	PIGL
8005202		SNORD49A
8005233
8005267	AY172136	RAI1
8005407	BC151838	LLGL1
8005473	AF013758	PAIP1
8005574
8005628
8005657
8005689	AY363305|BC094680|AK124785	LOC220594|LOC162632|USP32
8005753
8005809	AK126017	LGALS9
8005829	AY032661
8005955		SNORD42A
8006030	BC133039	TAOK1
8006112	BC040118|CR533555	CCDC55
8006123	BC051702	CPD
8006181
8006187	AY557611	ATAD5
8006237	BC062632	LOC400590
8006239	M89914	NF1
8006298	AY169244	RAB11FIP4
8006317
8006325	BC015704	SUZ12
8006345	AY094972	RHOT1
8006409	BC030792	CDK5R1
8006466		TMEM132E
8006562	AK122652	RASL10B
8006602	AY766446	CCL4|CCL4L2|LOC728835|CCL4L1
8006638	AF126964	GGNBP2
8006681	U14755	LHX1
8006746	AK292308|BC075809|AK292257|BC058890|AK095385	TBC1D3C|TBC1D3G|TBC1D3B|TBC1D3F|TBC1D3H|TBC1D3P2|TBC1D3I|LOC653380
8006779	AB040934	ARHGAP23
8006845	BC095445	RPL19
8006850	AF227198	CRKRS
8007118		LOC728318
8007259		HSD17B1
8007454	BC094842	RND2
8007471	BC009808	NBR1
8007537	BC025395	CD300LG
8007561	BC021574	G6PC3
8007637	AB017364	FZD2
8007794	BT007332|BC071681	ARL17P1|NBR2
8007797	BC105276	RPS26L|LOC728937|hCG_2033311|LOC641768|LOC645979
8007850	BC040501|AY386262|BC107850|AK000982|AK091625	LRRC37A|LRRC37A2|LRRC37A3|LOC652203|LRRC37A4
8007867	BC040501|AY386262|BC043145|BC107850|AK000982	LRRC37A2|LRRC37A3|LOC652203|LRRC37A4
8007917
8007919	BC040501|AK091733|AK000982	LRRC37A2|LRRC37A4
8007990
8007992	BC036703	KPNB1
8008029	AF093098	TBX21	*
8008201	BC050309	NGFR	*
8008228	BC005812	DLX4
8008277	L34355	SGCA
8008297	AJ277442	XYLT2
8008493	AK290540	CROP
8008629	BC130629	DGKE
8008716		MSX2P1
8008834	BC054489	CLTC
8008868	AF090926
8008885	AY699265	MIRN21
8008887	BC053365	RPS6KB1	*
8008967
8008980	BC046200	C17orf82
8009241		SNORD104
8009349
8009366	BC064404	NOL11
8009380		SNORA38B
8009382	AB032251	BPTF	*
8009430	BC080624	LOC440461
8009526	BC019610	SSTR2	*
8009552	AY163812	C17orf80
8009685	AK026581	SLC9A3R1
8009721	BC047534	CDR2L
8009873	AF418286	MYO15B
8010017	BC047782	CDK3|LOC100134934
8010082		SNORD1A
8010184	AK097965|AK093770	2009-09-01
8010243	BC000407	SYNGR2
8010271	BC108732	PGS1
8010285
8010287	AF232905	C1QTNF1
8010379	AF322642	CARD14
8010499	BC064545|BC045824|BC037889|BX647411	FLJ35220
8010560	AF258550|AF218021	LOC100129503
8010696	BC126128	NPB|LOC653419
8010783		UTS2R
8010820	U58197	FOXK2
8010897	BC082252	METRNL
8010915		FAM101B
8010967	AY189690	NXN
8010978	AK130278	LOC100130876
8011141	AF092565	PRPF8
8011188		TLCD2
8011218
8011220
8011375	AF196175	TRPV1
8011407	AF028823	TAX1BP3
8011415	BC039015	P2RX5
8011774	BC142695	CAMTA2
8011823		ZNF594
8012000
8012043	AB070933	ASGR1
[truncated: 2,862 more rows]
